# Supplementary material
Source: Research Square preprint supplement (doi:10.21203/rs.3.rs-10020395/v1)
Supplement: Supplementary file 1 [file 1e495a26df1643b8fba09362.pdf]

## Supporting information

### Ligand exchange and stability of CdTe nanoplatelets under mild conditions

Dulat Daurenbekov<sup>1</sup>, Aigerim Ospanova<sup>1\*</sup>, Asset Kainarbay<sup>1</sup>, Yerkebulan Koshkinbayev<sup>1</sup>, Mekhrdod S. Kurboniyon<sup>3</sup>, Rakhima Daurenbekova<sup>1\*</sup>, Aizhan Akhmetova<sup>1</sup>, Alexander Vinokurov<sup>2</sup>, Sergey Dorofeev<sup>2</sup>, Sergei Bubenov<sup>2</sup>

<sup>1</sup>Institute of Physical and Technical Sciences, L.N. Gumilyov Eurasian National University, Kazhymukan Str., 13, 010000 Astana, Kazakhstan, [aygerim-ospanova-00@mail.ru](mailto:aygerim-ospanova-00@mail.ru), [daurenbekova\\_rk@enu.kz](mailto:daurenbekova_rk@enu.kz)

<sup>2</sup>Department of Chemistry, Lomonosov Moscow State University, Leninskie Gory, 1–3, 119991 Moscow, Russia

<sup>3</sup>School of Integrated Circuits, Chongqing University of Posts and Telecommunications, Chongqing 400065, China

| Difference in precursors | Cd(prop), mmol | Cd(pr op), g | OA, $\mu\text{mol}$ | OA, $\mu\text{l}$ | ODE, ml | Degassing          |           | Injection   |         |          |                    | Time of synth., min |
|--------------------------|----------------|--------------|---------------------|-------------------|---------|--------------------|-----------|-------------|---------|----------|--------------------|---------------------|
|                          |                |              |                     |                   |         | Temp.              | Time, min | Top-Te, mkl | ODE, ml | V, total | Temp. Inj.=synth.  |                     |
| Standard                 | 0.5            | 0.13         | 0.25                | 80                | 10      | 110 <sup>0</sup> C | 30        | 100         | 0.5     | 600      | 170 <sup>0</sup> C | 20                  |
| +50% Cd                  | 0.75           | 0.195        | 0.25                | 80                | 10      | 110 <sup>0</sup> C | 30        | 100         | 0.5     | 600      | 170 <sup>0</sup> C | 20                  |
| -50% Cd                  | 0.25           | 0.065        | 0.25                | 80                | 10      | 110 <sup>0</sup> C | 30        | 100         | 0.5     | 600      | 170 <sup>0</sup> C | 20                  |
| +50% Te                  | 0.5            | 0.13         | 0.25                | 80                | 10      | 110 <sup>0</sup> C | 30        | 150         | 0.5     | 650      | 170 <sup>0</sup> C | 20                  |
| -50 % Te                 | 0.5            | 0.13         | 0.25                | 80                | 10      | 110 <sup>0</sup> C | 30        | 50          | 0.5     | 550      | 170 <sup>0</sup> C | 20                  |

Table S1. Protocol for the synthesis of CdTe nanoplatelets

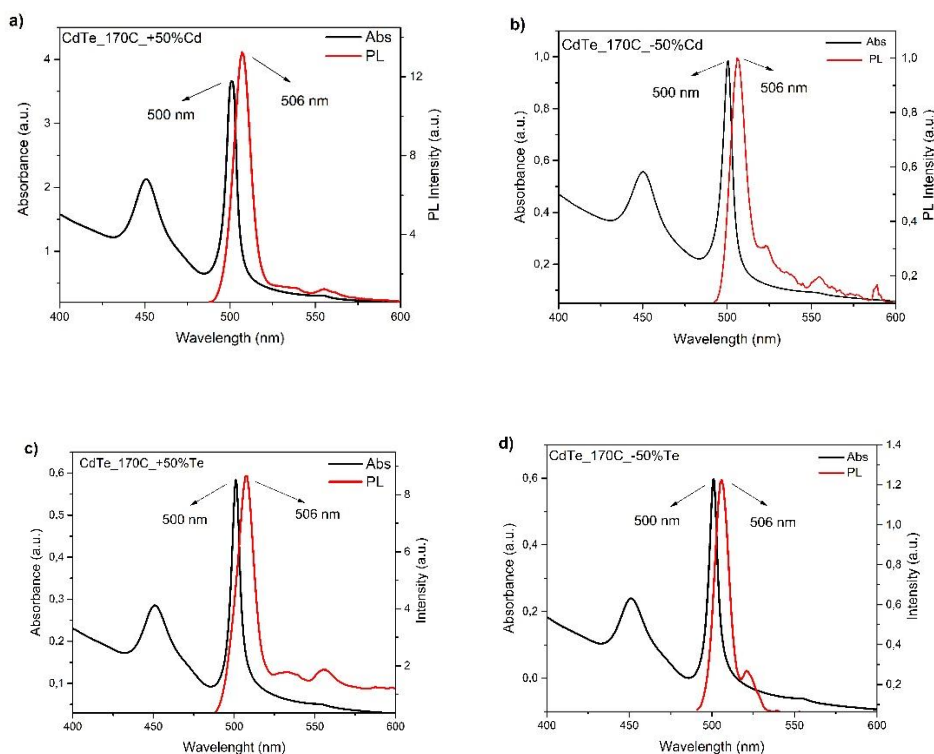

Figure S1. Absorption and luminescence spectra obtained on a Solar CM2203 and Jasco V770 spectrophotometer

The spectra in Fig. S1 indicate that the measurements performed one year earlier were reliable and reproducible, compare with newly repeated measurements on FLS1000 (except instrumental artefact observed near 525 nm).

In Fig. S2 the absorption spectrum of the another stage of ligand exchange experiments which was conducted using zinc diethyldithiocarbamate is shown.

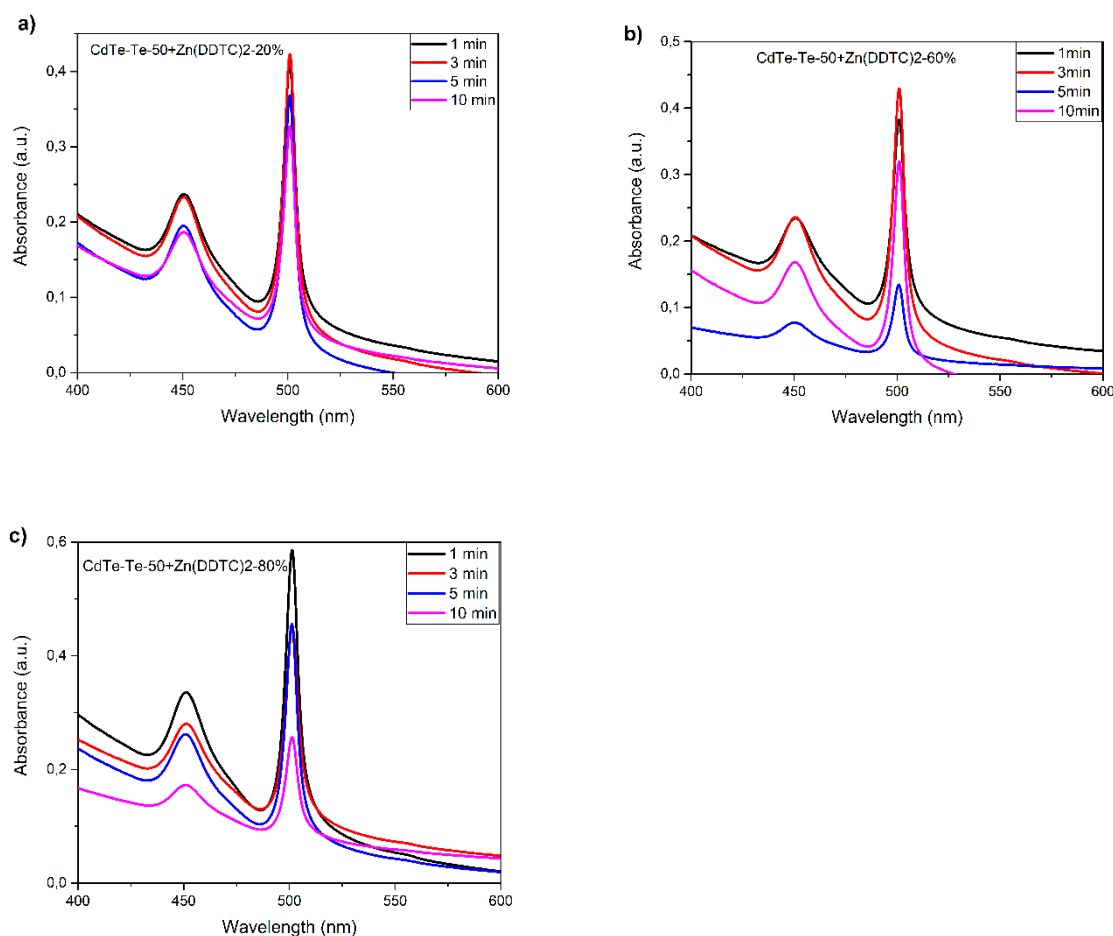

**Figure S2.** Absorption spectra of nanoplatelets with zinc diethyldithiocarbamate ligand in different ratios: a) 20%; b) 60%; c) 80%.

Figure S2 shows the absorption spectra of CdTe NPLs before and after the introduction of a  $\text{Zn}(\text{DDTC})_2$  solution at different time intervals. A pair of exciton maxima in the 450–500 nm range exhibits stability in their position and intensity over time, indicating the absence of significant changes in the band structure and thickness of the nanoplatelets. The lack of a noticeable effect on exciton transitions, even with increasing ligand concentration, suggests that, under mild organic conditions,  $\text{Zn}(\text{DDTC})_2$  barely replaces the initial cadmium-carboxylate ligands on the CdTe NPL surface and is unable to form a durable X-type dithiocarbamate coating.

| Purification | Mass (Cd),<br>ng | Mass (Te),<br>ng | Ratio of<br>elemets |
|--------------|------------------|------------------|---------------------|
| 1 stage      | 260.77           | 283.05           | 0.92                |
| 2 stage      | 327.0            | 356.7            | 0.92                |

Table S2. TXRF data table after first and second purification stages
